# Supplementary material for: DomSign: a top-down annotation pipeline to enlarge enzyme space in the protein universe
Source: PubMed Central journal article supplement (PMC4389672; doi:10.1186/s12859-015-0499-y), 2015-03-21

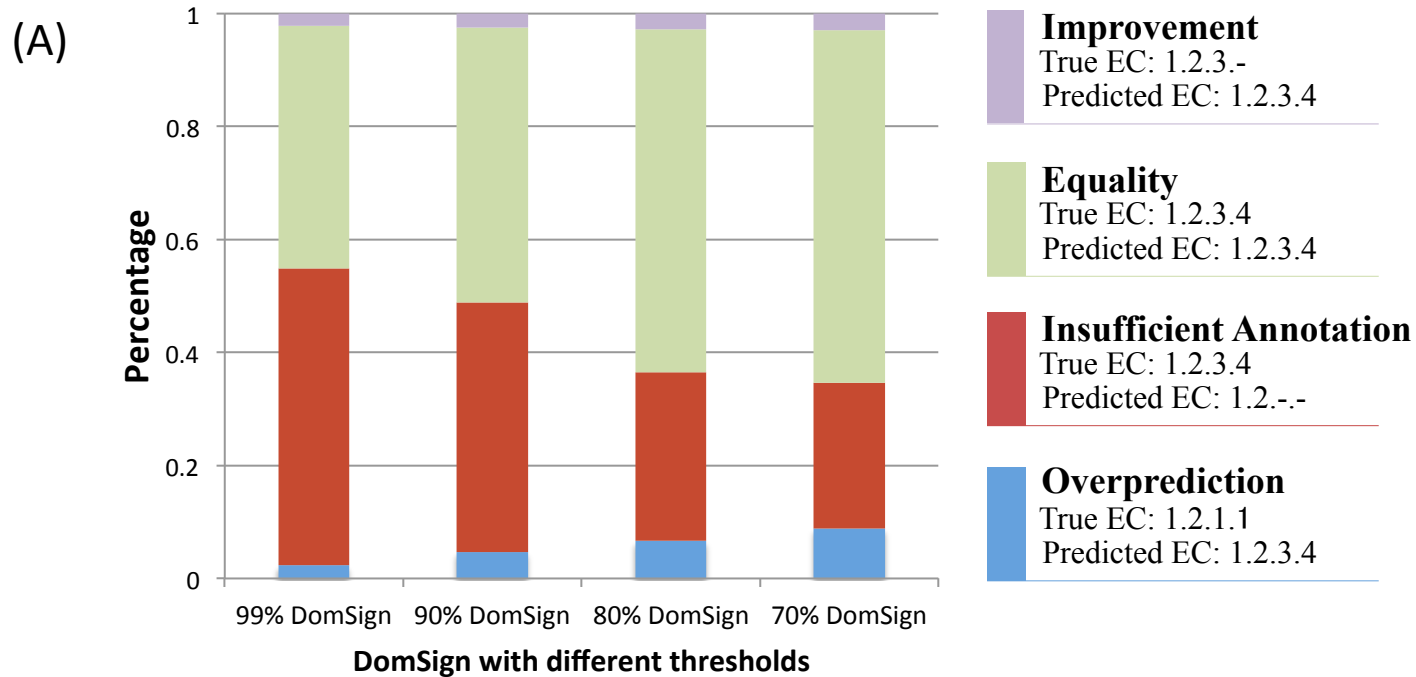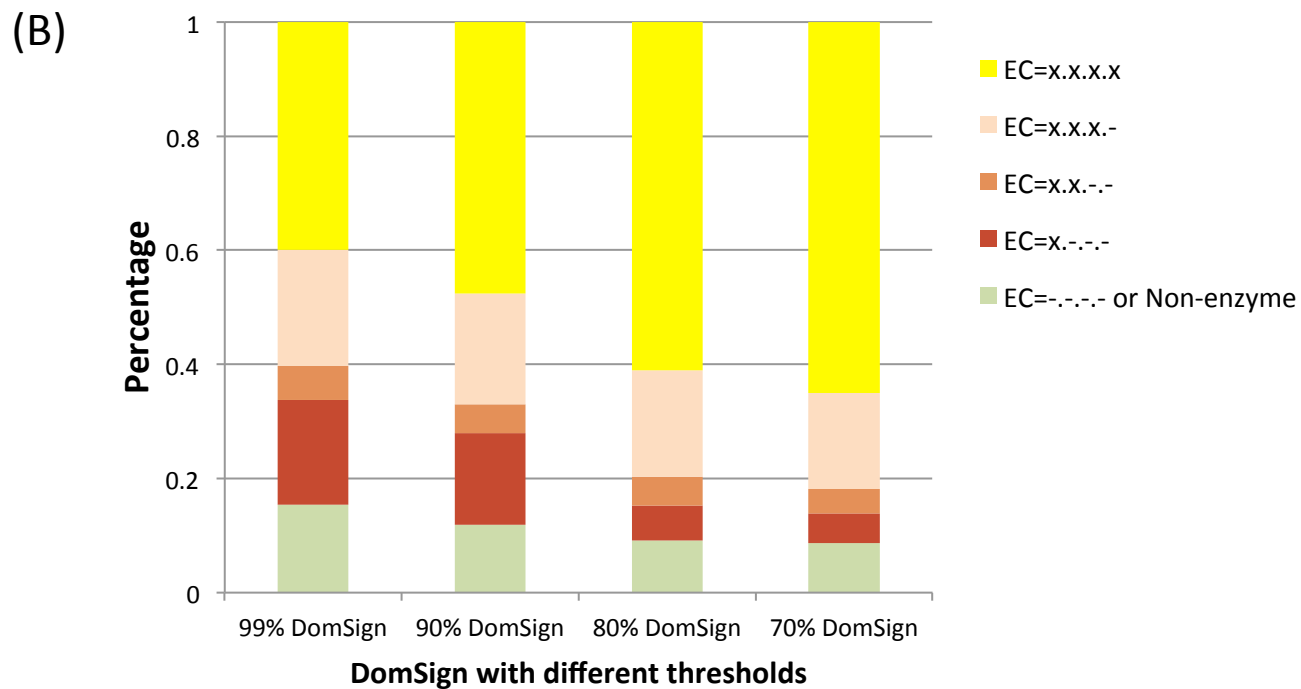

Supplement: 12859_2015_499_MOESM6_ESM.pdf [file 12859_2015_499_MOESM6_ESM.pdf]
